# Supplementary material for: IbMYB308, a Sweet Potato R2R3-MYB Gene, Improves Salt Stress Tolerance in Transgenic Tobacco
Source: MDPI journal article supplement (doi:10.3390/genes13081476), 2022-08-18
Supplement: s1 [file s1]

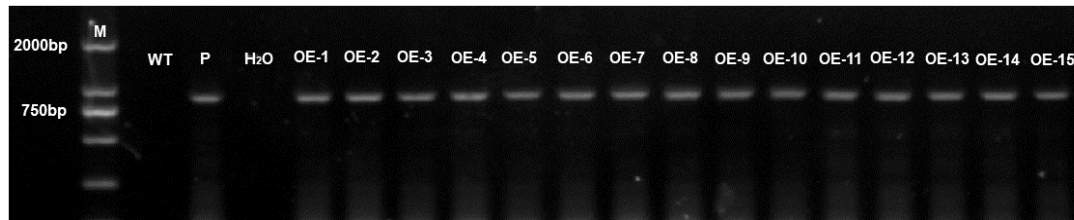

**Figure S2.** PCR Detection of *IbMYB308* overexpression tobacco. OE-1-15: *IbMYB308* transgenictobacco; WT: wild-typetobacco; P: overexpression plasmid of *IbMYB308*. M: DNA Maker DL2000.
