# Supplementary material for: IbMYB308, a Sweet Potato R2R3-MYB Gene, Improves Salt Stress Tolerance in Transgenic Tobacco
Source: MDPI journal article supplement (doi:10.3390/genes13081476), 2022-08-18
Supplement: s1 [file s1]

**Table S1.** Primers used in this experiment

| Primer name          | Primer sequences (5'-3')      |
|----------------------|-------------------------------|
| <i>IbMYB308-F</i>    | ATGGGAAGGTCTCCTTGCT           |
| <i>IbMYB308-R</i>    | CTAATTGCTGCTGCTGCTG           |
| <i>IbMYB308pro-F</i> | ACACACCCATTTTCGTCCTT          |
| <i>IbMYB308pro-R</i> | CTTTTTCGCAGCAAGGAGAC          |
| <i>IbMYB308-F1</i>   | GCCACCGTCGTCCCAAGAAA          |
| <i>IbMYB308-R1</i>   | AAGCACAACCCGTTGACCCTC         |
| <i>IbMYB308-F2</i>   | GCGCGGTACCATGGGAAGGTCTCCTTGCT |
| <i>IbMYB308-R2</i>   | GCGCGGATCCCTAATTGCTGCTGCTGCTG |
| <i>IbActin-F</i>     | AGCAGCATGAAGATTAAGGTTGTAGCAC  |
| <i>IbActin-R</i>     | TGGAAAATTAGAAGCACTTCCTGTGAAC  |
| 35S-F                | TTGATGTGATATCTCCACTGACG       |
| 1300-R               | GCGCGGATCCCTAATTGCTGCTGCTGCTG |
| <i>NtActin-F</i>     | GAGGAATGCAGATCTTCGTG          |
| <i>NtActin-R</i>     | TCCTTGTCTGGATCTTAGC           |
| <i>SOD-F</i>         | CTATTACCGACAAGCAGATTCCTC      |
| <i>SOD-R</i>         | TACCACAAGCAACCCTTCCAC         |
| <i>POD-F</i>         | TCCGGGAGCCACACCATTGG          |
| <i>POD-R</i>         | TGGTCGGAATTCAACAG             |
| <i>APX-F</i>         | GATGTTCCCTTTCACCCTGG          |
| <i>APX-R</i>         | CAGATAGACCCATTTGCTTCACA       |
| <i>P5CS-F</i>        | TTGTGACACGGACTGATGGAA         |
| <i>P5CS-R</i>        | TATCTAAGCCGCTGACGACCA         |
