# Supplementary figures and images for: IbMYB308, a Sweet Potato R2R3-MYB Gene, Improves Salt Stress Tolerance in Transgenic Tobacco
Source: MDPI journal article supplement (doi:10.3390/genes13081476), 2022-08-18

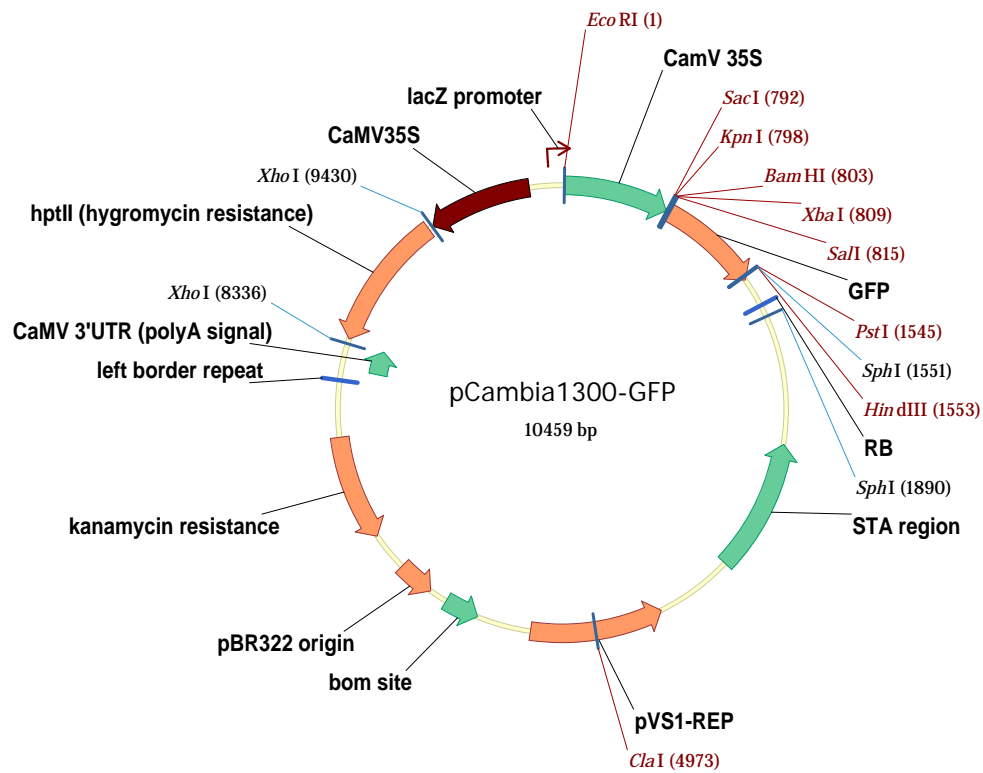

(a)

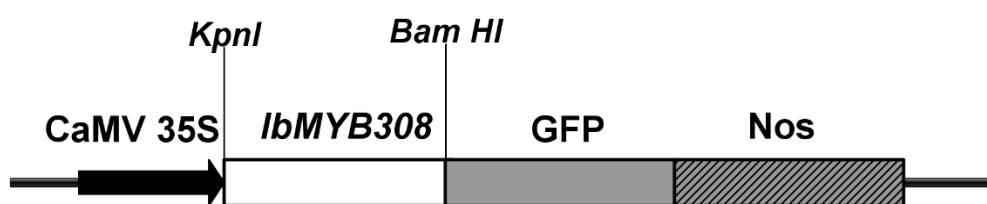

(b)

**Figure S1.** (a) pCAMBIA1300 vector, (b) Recombinant plasmid pCAMBIA-*IbMYB308*-GFP

Supplement: s1 [file s1]
